# Supplementary material for: Day and night camera trap videos are effective for identifying individual wild Asian elephants
Source: PeerJ. 2023 Mar 28;11:e15130. doi: 10.7717/peerj.15130 (PMC10064994; doi:10.7717/peerj.15130)
Supplement: Supplemental Information 6 — The raw data coded, using specific characteristics, for each individual elephant identified. Note that most characteristics are not coded for elephants in the C & D age categories unless they had distinct characteristics, however, these age groups were not included in our pmax analyses. [file peerj-11-15130-s006.xlsx]

## Sheet: Sheet1
ID	Sex	Age class	Body Condition	Presence of tusks/tushes	Tusk Symmetry	Tusk arrangement	L tusk angle	R tusk angle	L ear top fold	R ear top fold	L ear side fold	R ear side fold	L ear lobe shape	R ear lobe shape	L ear tear	R ear tear	L ear hole	R ear hole	L ear depigmentation	R ear depigmentation	Tail length	Brush type	Back shape	Depigmentation on body
M001	Male	B	1	Both	Even	Parallel	Straight Ahead	Straight Ahead	Forward slightly	Forward slightly	Backward	Backward	V-acute	V-acute	None	None	None	None	Present- Prominent	Present- Prominent	Below knee, above ankle	Short both	Humped	Present on body
M002	Male	A	2	None	N/A	N/A	N/A	N/A	Backward	Backward	Backward	Backward	L-angular	L-angular	At side fold	None	None	None	Present- Slight	Present- Slight	Below knee, above ankle	Normal both	Humped	N/A
F001	Female	A	1	None	N/A	N/A	N/A	N/A	Forward flat fold	Forward flat fold	Backward	Backward	V-acute	V-acute	None	At side fold	None	None	Present- Prominent	Present- Prominent	Below knee, above ankle	Normal both	Humped	Both
F001A	Male	B	1	Both		Parallel	Pointed down	Pointed down	None	None	Backward	Backward	V-acute	V-acute	None	None	None	None	None	None	Below knee, above ankle	Normal both	Humped	None
F001B	N/A	C
M003	Male	A	2	None	N/A	N/A	N/A	N/A	Forward rolling fold	Forward rolling fold	Forward	Forward	V-acute	V-acute	N/A	After side fold	None	None	Present- Slight	Present- Slight	Below knee, above ankle	Normal anterior	Humped	N/A
M004	Male	A	2	Both	Even	Splayed	Straight Ahead	Straight Ahead	Forward flat fold	Forward flat fold	Backward	Backward	V-acute	V-acute	None	None	None	None	Present- Slight	Present- Slight	Below knee, above ankle	Normal both	Humped	None
M005	Male	B	1	Both	Even	Parallel	Straight Ahead	Straight Ahead	Forward rolling fold	Forward rolling fold	Forward	Forward	U-rounded	U-rounded	None	None	None	None	Present- Slight	Present- Slight	Below knee, above ankle	Short both	Humped	None
M006	Male	B	1	Both	Even	Parallel	Pointed down	Pointed down	None	None	Forward	Forward	V-acute	V-acute	None	None	None	None	None	None	Below knee, above ankle	Normal anterior short posterior	Humped	None
F002	Female	A	1	None	N/A	N/A	N/A	N/A	Forward slightly	Forward slightly	Backward	Backward	V-acute	V-acute	None	None	None	None	Present- Prominent	Present- Prominent	Below knee, above ankle	Normal both	Humped	None
F002A		C
M007	Male	A	2	R only	N/A	N/A	N/A	N/A	N/A	Forward rolling fold	N/A	Forward	N/A	U-rounded	N/A	After side fold	N/A	At side fold	N/A	Present- Slight	Stump (above abdomen)	No hair	Humped	N/A
M008	Male	A	2	None	N/A	N/A	N/A	N/A	Forward flat fold	Forward flat fold	Backward	Backward	L-angular	L-angular	N/A	At side fold	None	None	Present- Prominent	Present- Prominent	Below knee, above ankle	Normal anterior	Flat	Present on trunk
F003	Female	A	1	None	N/A	N/A	N/A	N/A	Forward flat fold	Forward flat fold	Backward	Backward	V-acute	V-acute	None	None	None	None	Present- Prominent	Present- Prominent	Below knee, above ankle	Normal both	Humped	Present on body
F003A		D
F004	Female	A	1	None	N/A	N/A	N/A	N/A	Forward flat fold	Forward flat fold	Forward	Forward	V-acute	V-acute	After side fold	None	None	None	Present- Prominent	Present- Prominent	Below knee, above ankle	Normal both	Humped	None
F004A		C
M009	Male	A	1	None	N/A	N/A	N/A	N/A	Forward flat fold	Forward flat fold	Forward	Forward	V-acute	V-acute	On top fold	After side fold	None	None	Present- Prominent	Present- Prominent	Below knee, above ankle	Normal both	Humped	Both
M010	Male	A	2	Both	Uneven	Convergent	Straight Ahead	Pointed down	Forward slightly	Forward slightly	Backward	Backward	N/A	U-rounded	N/A	None	N/A	None	N/A	N/A	Below genitals, above knee	No hair	N/A	N/A
M011	Male	A	2	None	N/A	N/A	N/A	N/A	Forward slightly	Forward slightly	Backward	Backward	V-acute	V-acute	At side fold	None	None	At side fold	Present- Prominent	Present- Prominent	Below knee, above ankle	Normal both	Humped	Present on body
M012	Male	A	2	None	N/A	N/A	N/A	N/A	Forward rolling fold	Forward rolling fold	Forward	Forward	V-acute	U-rounded	After side fold	None	None	None	Present- Slight	Present- Slight	N/A	N/A	N/A	N/A
M013	Male	A	2	None	N/A	N/A	N/A	N/A	Forward rolling fold	Forward rolling fold	Backward	Backward	V-acute	V-acute	None	After side fold	None	None	Present- Prominent	Present- Prominent	Below genitals, above knee	No hair	Humped	Both
M014	Male	A	2	None	N/A	N/A	N/A	N/A	Forward slightly	N/A	Backward	N/A	V-acute	N/A	After side fold	N/A	None	N/A	None	N/A	Below knee, above ankle	No hair	Humped	None
F005	Female	A	1	None	N/A	N/A	N/A	N/A	Forward rolling fold	Forward slightly	Backward	Backward	L-angular	L-angular	None	None	None	None	Present- Slight	Present- Slight	Below knee, above ankle	Normal anterior short posterior	Humped	Present on body
F005A	Male	C	1	Both	Even	Parallel	Pointed down	Pointed down	None	N/A	Backward	N/A	V-acute	N/A	None	N/A	None	N/A	None	N/A	Below knee, above ankle	Normal both	Humped	None
F006	Female	A	1	None	N/A	N/A	N/A	N/A	None	Forward rolling fold	Backward	Backward	V-acute	V-acute	None	None	At side fold	None	Present- Slight	Present- Slight	Below knee, above ankle	Normal both	Humped	None
M015	Male	B	1	L only	N/A	N/A	Pointed down	N/A	Backward	N/A	Backward	N/A	V-acute	N/A	None	N/A	None	N/A	None	N/A	Below knee, above ankle	Normal both	Humped	None
M016	Male	A	2	None	N/A	N/A	N/A	N/A	Forward rolling fold	N/A	Backward	N/A	L-angular	N/A	After side fold	N/A	None	N/A	None	None	Below knee, above ankle	Normal both	Humped	None
M017	Male	A	1	None	N/A	N/A	N/A	N/A	Forward flat fold	Forward flat fold	Forward	Forward	V-acute	V-acute	After side fold	At side fold	None	N/A	None	None	Below knee, above ankle	Normal both	Humped	None
M018	Male	A	1	None	N/A	N/A	N/A	N/A	Backward	Backward	Backward	Backward	V-acute	V-acute	None	None	None	None	None	None	Below knee, above ankle	N/A	Humped	N/A
M019	Male	A	1	None	N/A	N/A	N/A	N/A	Forward rolling fold	Forward rolling fold	Backward	Backward	L-angular	V-acute	After side fold	None	None	None	Present- Slight	Present- Slight	Below knee, above ankle	Normal both	Humped	None
M020	Male	A	2	None	N/A	N/A	N/A	N/A	Forward flat fold	Forward flat fold	Forward	Forward	L-angular	L-angular	After side fold	At side fold	None	None	Present- Slight	Present- Slight	Below knee, above ankle	Normal anterior	Humped	N/A
M021	Male	B	1	Both	Even	Parallel	Straight Ahead	Straight Ahead	Forward rolling fold	Forward slightly	Forward	Backward	U-rounded	U-rounded	At side fold	At side fold	None	None	Present- Slight	Present- Slight	Below knee, above ankle	Normal anterior short posterior	Humped	None
M022	Male	A	1	None	N/A	N/A	N/A	N/A	N/A	Forward flat fold	Backward	Backward	V-acute	V-acute	At side fold	At side fold	None	None	Present- Prominent	Present- Prominent	Below knee, above ankle	Normal anterior	Humped	Both
F007	Female	A	1	None	N/A	N/A	N/A	N/A	Forward rolling fold	Forward rolling fold	Backward	Backward	V-acute	V-acute	None	None	None	None	Present- Slight	Present- Slight	Below knee, above ankle	Normal anterior	Humped	None
F007A	N/A	B	1	None	N/A	N/A	N/A	N/A	Forward slightly	Forward slightly	Backward	Backward	V-acute	V-acute	None	At side fold	None	None	Present- Slight	Present- Slight	Below knee, above ankle	Normal both	Humped	None
F007B	N/A	C	1	None	N/A	N/A	N/A	N/A	Backward	Backward	Backward	Backward	V-acute	V-acute	None	None	None	None	None	None	Below knee, above ankle	Normal both	Humped	None
F007C		D
M023	Male	A	2	Both	Uneven	Convergent	Straight Ahead	Straight Ahead	Forward flat fold	Forward rolling fold	Backward	Backward	V-acute	V-acute	At side fold	At side fold	None	None	Present- Slight	Present- Slight	Below knee, above ankle	Normal both	Humped	Both
M024	Male	A	1	None	N/A	N/A	N/A	N/A	Forward rolling fold	Forward flat fold	Backward	Forward	V-acute	V-acute	At side fold	At side fold	None	At side fold	Present- Prominent	Present- Prominent	Below genitals, above knee	No hair	Humped	Both
M025	Male	A	1	None	N/A	N/A	N/A	N/A	Forward rolling fold	Forward rolling fold	Backward	Backward	V-acute	V-acute	None	None	None	None	Present- Slight	Present- Slight	Below knee, above ankle	Normal both	Humped	None
M026	Male	A	2	None	N/A	N/A	N/A	N/A	N/A	Forward rolling fold	N/A	Backward	N/A	V-acute	N/A	After side fold	N/A	None	N/A	Present- Prominent	At ankle	Normal both	Humped	Both
F008	Female	A	1	None	N/A	N/A	N/A	N/A	Forward rolling fold	Forward flat	Backward	Backward	V-acute	V-acute	At side fold	At side fold	None	None	Present- Slight	Present- Slight	Below knee, above ankle	Normal both	Humped	None
F008A		C
F008B		C
M027	Male	A	1	Both	Uneven	Convergent	Straight Ahead	Straight Ahead	Forward rolling fold	Forward rolling fold	Backward	Backward	U-rounded	U-rounded	At side fold	At side fold	None	None	None	None	Below knee, above ankle	Short both	Humped	None
M028	Male	A	1	None	N/A	N/A	N/A	N/A	Forward slightly	Forward rolling fold	Backward	Backward	V-acute	V-acute	At side fold	At side fold	After side fold	None	Present- Prominent	Present- Prominent	Below knee, above ankle	Short anterior	Humped	Both
M029	Male	A	1	None	N/A	N/A	N/A	N/A	Forward rolling fold	Forward flat fold	Backward	Backward	V-acute	V-acute	After side fold	At side fold	None	None	Present- Slight	Present- Slight	Below knee, above ankle	Normal both	Humped	None
M030	Male	A	2	Both	Uneven	Splayed	N/A	Straight Ahead	Forward flat fold	Forward flat fold	Backward	Backward	V-acute	V-acute	At side fold	At side fold	None	Before side fold	Present- Slight	Present- Slight	Below genitals, above knee	Normal anterior	Humped	None
M031	Male	A	2	None	N/A	N/A	N/A	N/A	Forward rolling fold	Forward rolling fold	Backward	Forward	V-acute	L-angular	At side fold	None	None	None	Present- Prominent	Present- Prominent	Below knee, above ankle	Normal both	Humped	Both
F009	Female	A	2	None	N/A	N/A	N/A	N/A	Forward rolling fold	Forward rolling fold	Forward	Forward	V-acute	V-acute	None	None	None	After side fold	N/A	N/A	Below knee, above ankle	Normal anterior	Flat	N/A
F009A	N/A	C	2	None	N/A	N/A	N/A	N/A	None	None	N/A	N/A	N/A	N/A	N/A	N/A	N/A	N/A	N/A	N/A	Below genitals, above knee	Normal anterior	Humped	None
M032	Male	A	2	None	N/A	N/A	N/A	N/A	N/A	Forward rolling fold	N/A	Forward	N/A	N/A	N/A	At side fold	N/A	None	N/A	N/A	At knee	Normal anterior	Humped	N/A
M033	Male	A	1	None	N/A	N/A	N/A	N/A	Forward slightly	N/A	Backward	N/A	V-acute	N/A	None	N/A	None	N/A	Present- Prominent	N/A	Below knee, above ankle	Normal both	N/A	None
M034	Male	A	1	None	N/A	N/A	N/A	N/A	Forward slightly	Forward slightly	Backward	Backward	V-acute	V-acute	None	At side fold	None	None	Present- Slight	Present- Slight	Below knee, above ankle	Normal both	Humped	None
M035	Male	A	1	None	N/A	N/A	N/A	N/A	Forward flat fold	Forward flat fold	Backward	Backward	L-angular	V-acute	After side fold	At side fold	None	None	Present- Prominent	Present- Prominent	Stump (above abdomen)	No hair	Humped	Present on body
F010	Female	A	1	None	N/A	N/A	N/A	N/A	Forward slightly	Forward slightly	Backward	Backward	V-acute	V-acute	At side fold	None	None	None	Present- Prominent	Present- Prominent	Below knee, above ankle	Normal both	Humped	Both
F010A		C
F011	Female	B	1	None	N/A	N/A	N/A	N/A	None	None	Backward	Backward	V-acute	V-acute	None	None	None	None	None	None	At knee	Normal both	Humped	None
F012	Female	A	1	None	N/A	N/A	N/A	N/A	Forward rolling fold	Forward rolling fold	Backward	Backward	V-acute	V-acute	None	At side fold	None	None	Present- Slight	Present- Slight	Below knee, above ankle	Normal both	Humped	None
F012A		C
M036	Male	A	1	None	N/A	N/A	N/A	N/A	Forward rolling fold	Forward flat fold	Backward	Backward	U-rounded	U-rounded	After side fold	At side fold	None	None	Present- Prominent	Present- Prominent	Below knee, above ankle	Normal both	Flat	Both
M037	Male	A	1	None	N/A	N/A	N/A	N/A	Forward rolling fold	Forward rolling fold	Backward	Backward	U-rounded	U-rounded	At side fold	At side fold	None	None	Present- Prominent	Present- Prominent	Below knee, above ankle	Normal both	Humped	Both
M038	Male	A	1	None	N/A	N/A	N/A	N/A	Forward slightly	Forward slightly	Backward	Backward	V-acute	V-acute	At side fold	At side fold	None	None	Present- Slight	Present- Slight	At knee	No hair	Humped	Both
M039	Male	A	1	None	N/A	N/A	N/A	N/A	Forward rolling fold	Forward rolling fold	Backward	Backward	U-rounded	U-rounded	At side fold	At side fold	None	None	Present- Prominent	Present- Prominent	Below knee, above ankle	Normal anterior short posterior	Humped	Both
F013	Female	A	1	None	N/A	N/A	N/A	N/A	Forward slightly	Forward slightly	Backward	Backward	V-acute	V-acute	At side fold	After side fold	N/A	N/A	Present- Slight	Present- Slight	At knee	Normal both	Humped	N/A
F013A		C
F013B		D
M040	Male	A	1	None	N/A	N/A	N/A	N/A	Forward rolling fold	Forward rolling fold	Backward	Backward	L-angular	L-angular	None	None	None	None	Present- Prominent	Present- Prominent	Below knee, above ankle	Normal both	Humped	Both
M041	Male	A	1	None	N/A	N/A	N/A	N/A	Forward rolling fold	Forward rolling fold	Backward	Backward	V-acute	V-acute	None	After side fold	None	None	Present- Prominent	Present- Prominent	Below knee, above ankle	Normal both	Humped	Both
F014	Female	A	1	None	N/A	N/A	N/A	N/A	Forward slightly	Forward slightly	Backward	Backward	V-acute	V-acute	At side fold	None	None	None	Present- Prominent	Present- Prominent	At knee	No hair	Humped	Both
F014A	N/A	C	1	None	N/A	N/A	N/A	N/A	Forward slightly	Forward slightly	Backward	Forward	V-acute	V-acute	None	None	None	None	None	None	Below knee, above ankle	Normal both	Humped	Present on trunk
M042	Male	A	2	None	N/A	N/A	N/A	N/A	Forward rolling fold	Forward rolling fold	Backward	Backward	L-angular	L-angular	After side fold	After side fold	None	None	Present- Prominent	Present- Prominent	Below knee, above ankle	Normal both	Humped	Both
F015	Female	A	1	None	N/A	N/A	N/A	N/A	Forward rolling fold	Forward rolling fold	Backward	Backward	U-rounded	U-rounded	N/A	None	N/A	None	Present- Prominent	Present- Prominent	At ankle	Normal anterior short posterior	Humped	Present on trunk
F015A	N/A	C	1	None	N/A	N/A	N/A	N/A	None	None	Backward	Backward	V-acute	V-acute	N/A	None	N/A	None	None	None	Below knee, above ankle	Normal both	Humped	None
F016	Female	A	1	None	N/A	N/A	N/A	N/A	Forward slightly	Forward slightly	Backward	Backward	V-acute	V-acute	After side fold	None	None	None	Present- Prominent	Present- Prominent	At ankle	Normal both	Flat	Both
F016A	N/A	C	1	None	N/A	N/A	N/A	N/A	Forward slightly	Forward slightly	Backward	Backward	V-acute	V-acute	None	None	None	None	None	None	Below knee, above ankle	Normal both	Humped	None
F016B	N/A	C	1	None	N/A	N/A	N/A	N/A	None	None	Backward	Backward	V-acute	V-acute	None	None	None	None	None	None	At ankle	Normal both	Humped	None
M043	Male	A	1	None	N/A	N/A	N/A	N/A	N/A	Forward rolling fold	N/A	Backward	N/A	V-acute	N/A	None	N/A	None	N/A	Present- Prominent	Below knee, above ankle	Normal both	Humped	Both
M044	Male	A	1	None	N/A	N/A	N/A	N/A	Forward flat fold	Forward flat fold	Backward	Backward	V-acute	V-acute	At side fold	At side fold	None	At side fold	Present- Prominent	Present- Prominent	Below genitals, above knee	No hair	Humped	Both
F017	Female	A	1	None	N/A	N/A	N/A	N/A	N/A	Forward slightly	Forward	Backward	N/A	V-acute	None	None	None	None	Present- Prominent	Present- Prominent	Below knee, above ankle	Normal both	Humped	Present on body
F017A	N/A	C	1	None	N/A	N/A	N/A	N/A	Forward slightly	Forward slightly	Backward	Backward	U-rounded	U-rounded	None	None	None	None	N/A	Present- Slight	Below knee, above ankle	Normal both	Humped	None
F017B	N/A	C	1	None	N/A	N/A	N/A	N/A	Forward slightly	Forward slightly	Forward	Forward	V-acute	V-acute	None	None	None	None	None	None	Below knee, above ankle	Normal both	Humped	Both
F018	Female	A	1	None	N/A	N/A	N/A	N/A	Forward rolling fold	Forward rolling fold	Backward	Backward	V-acute	V-acute	At side fold	After side fold	None	After side fold	Present- Prominent	Present- Slight	Below knee, above ankle	Normal anterior	Humped	Present on trunk
F018A	N/A	C	1	None	N/A	N/A	N/A	N/A	Forward slightly	Forward slightly	Forward	Forward	V-acute	V-acute	None	None	None	None	None	None	Below knee, above ankle	Normal both	Humped	None
F018B	N/A	D	1	None	N/A	N/A	N/A	N/A	None	None	Forward	Forward	N/A	N/A	None	None	None	None	None	None	N/A	N/A	Humped	None
F019	Female	A	1	None	N/A	N/A	N/A	N/A	Forward rolling fold	Forward rolling fold	Backward	Backward	V-acute	V-acute	None	After side fold	None	None	Present- Prominent	Present- Prominent	Below knee, above ankle	No hair	Humped	Both
F019A	N/A	C	1	None	N/A	N/A	N/A	N/A	None	N/A	N/A	Forward	N/A	V-acute	None	None	None	None	None	None	Below knee, above ankle	Normal both	Humped	None
M045	Male	A	2	None	N/A	N/A	N/A	N/A	N/A	Forward flat fold	N/A	Forward	N/A	U-rounded	None	At side fold	N/A	At side fold	N/A	Present- Prominent	Below knee, above ankle	Short anterior	Humped	Both
M046	Male	A	1	Both	Even	Parallel	Intermediate	Straight ahead	Forward flat fold	Forward flat fold	Forward	Forward	V-acute	V-acute	N/A	After side fold	N/A	N/A	Present- Prominent	N/A	Below knee, above ankle	Normal anterior	Humped	N/A
M047	Male	A	1	None	N/A	N/A	N/A	N/A	N/A	Forward rolling fold	Backward	Backward	V-acute	V-acute	After side fold	After side fold	N/A	N/A	Present- Prominent	Present- Prominent	Below knee, above ankle	Normal both	Humped	N/A
M048	Male	A	2	None	N/A	N/A	N/A	N/A	Forward rolling fold	Forward rolling fold	Forward	Forward	V-acute	V-acute	At side fold	None	None	None	N/A	N/A	Below knee, above ankle	N/A	Humped	Present on trunk
M049	Male	A	1	None	N/A	N/A	N/A	N/A	Forward slightly	Forward slightly	Backward	Backward	V-acute	V-acute	N/A	N/A	N/A	N/A	Present- Slight	Present- Slight	Below knee, above ankle	Normal anterior	Flat	N/A
M050	Male	A	2	None	N/A	N/A	N/A	N/A	Forward rolling fold	Forward rolling fold	Backward	Backward	V-acute	V-acute	At side fold	N/A	None	None	Present- Slight	Present- Slight	At ankle	Normal both	Humped	Both
M051	Male	A	2	None	N/A	N/A	N/A	N/A	Forward rolling fold	Forward rolling fold	Backward	Backward	U-rounded	U-rounded	After side fold	After side fold	None	None	Present- Prominent	Present- Prominent	Below knee, above ankle	Normal both	Flat	Both
M052	Male	B	2	None	N/A	N/A	N/A	N/A	Forward flat fold	Forward flat fold	Backward	Forward	V-acute	V-acute	At side fold	At side fold	None	None	Present- Prominent	Present- Prominent	At knee	Normal anterior	Flat	Both
F020	Female	A	1	None	N/A	N/A	N/A	N/A	Forward flat fold	Forward flat fold	Forward	Backward	V-acute	V-acute	At side fold	After side fold	None	None	Present- Slight	Present- Slight	Below knee, above ankle	Normal both	Humped	Both
F021	Female	A	1	None	N/A	N/A	N/A	N/A	Forward slightly	Forward slightly	Backward	Backward	V-acute	V-acute	None	None	None	None	Present- Prominent	Present- Prominent	At ankle	Normal both	Flat	Present on trunk
F021A	Female	B	1	None	N/A	N/A	N/A	N/A	Forward slightly	Forward slightly	Backward	Backward	V-acute	V-acute	None	None	None	None	Present- Slight	Present- Slight	At ankle	Normal anterior	Flat	None
F021B	N/A	C	1	None	N/A	N/A	N/A	N/A	None	None	Forward	Forward	V-acute	V-acute	None	None	None	None	None	None	Below knee, above ankle	Normal both	Humped	None
M053	Male	A	1	None	N/A	N/A	N/A	N/A	Forward rolling fold	Forward rolling fold	Backward	Backward	V-acute	V-acute	At side fold	N/A	None	None	Present- Prominent	Present- Prominent	Below knee, above ankle	Short both	Humped	Both
M054	Male	A	1	None	N/A	N/A	N/A	N/A	Forward rolling fold	Forward rolling fold	Backward	Backward	U-rounded	U-rounded	None	After side fold	None	None	Present- Prominent	Present- Prominent	Below knee, above ankle	Normal both	Humped	Both
M055	Male	A	1	L only	Uneven	N/A	Pointed down	N/A	Forward rolling fold	Forward rolling fold	Backward	Backward	V-acute	V-acute	At side fold	N/A	None	None	Present- Slight	Present- Slight	Below knee, above ankle	Normal both	Humped	N/A
M056	Male	A	1	None	N/A	N/A	N/A	N/A	Forward rolling fold	Forward flat fold	Backward	Backward	V-acute	V-acute	At side fold	N/A	None	None	Present- Prominent	Present- Prominent	Below knee, above ankle	Normal anterior	Flat	N/A
M057	Male	B	1	None	N/A	N/A	N/A	N/A	Forward slightly	Forward slightly	Backward	Backward	V-acute	V-acute	None	None	None	None	Present- Slight	Present- Slight	Below knee, above ankle	Normal both	Humped	Both
M058	Male	A	1	None	N/A	N/A	N/A	N/A	Forward flat fold	Forward flat fold	Backward	Backward	L-angular	L-angular	At side fold	None	None	None	Present- Slight	Present- Slight	Below knee, above ankle	Normal both	Humped	Present on trunk
M059	Male	A	2	None	N/A	N/A	N/A	N/A	Forward rolling fold	Forward slightly	Backward	Backward	U-rounded	U-rounded	N/A	N/A	N/A	N/A	Present- Prominent	Present- Prominent		N/A	Humped	Present on trunk
