# Supplementary material for: Day and night camera trap videos are effective for identifying individual wild Asian elephants
Source: PeerJ journal article supplement (doi:10.7717/peerj.15130), 2023-03-28
Supplement: SUPPTABLE_staffRL.pdf [file SUPPTABLE_staffRL.pdf]

# Supplemental Material

## Day and night camera trap videos are effective for identifying individual wild Asian elephants

Sasha Montero-De La Torre<sup>1</sup>, Sarah L. Jacobson<sup>1,2</sup>, Martin Chodorow<sup>1,2</sup>, Marnoch Yindee<sup>3,\*</sup>, Joshua M. Plotnik<sup>1,2,#</sup>

<sup>1</sup> Department of Psychology, Hunter College, City University of New York, New York, NY

<sup>2</sup> Department of Psychology, The Graduate Center, City University of New York, New York, NY

<sup>3</sup> Akkhraratchakumari Veterinary College and One Health Research Centre, Walailak University, Nakhon Si Thammarat, Thailand

### Correspondence:

There are Two Corresponding Authors (\*, #)

\*[drfungy2000@yahoo.com](mailto:drfungy2000@yahoo.com); #[Joshua.Plotnik@gmail.com](mailto:Joshua.Plotnik@gmail.com)

**Table S1:  
24 characteristics and the traits for identifying individuals**

Characteristics adapted from Goswami et al. (2007); de Silva et al. (2013); Vidya et al. (2014). The combination column indicates that there could be two different traits on the right or left (R/L) side of the elephant (similar to Vidya et al., 2014). N/A was used if poor picture quality did not allow the trait to be determined or if only one side of the elephant was visible in videos.

| <b>Characteristic</b>           | <b>Trait States</b>                                                                      | <b>Combination</b> |
|---------------------------------|------------------------------------------------------------------------------------------|--------------------|
| <b>Sex</b>                      | Male<br>Female<br>N/A                                                                    |                    |
| <b>Age class</b>                | A<br>B<br>C<br>D<br>N/A                                                                  |                    |
| <b>Body condition</b>           | 0<br>1<br>2<br>N/A                                                                       |                    |
| <b>Presence of tusks/tushes</b> | None<br>Both<br>R only<br>L only<br>N/A                                                  |                    |
| <b>Tusk Symmetry</b>            | Even<br>Uneven<br>N/A                                                                    |                    |
| <b>Tusk arrangement</b>         | Parallel<br>Convergent<br>Splayed<br>N/A                                                 |                    |
| <b>Tusk angle</b>               | Straight ahead<br>Intermediate<br>Pointed down<br>N/A                                    | R/L                |
| <b>Ear top fold</b>             | None<br>Forward slightly<br>Forward rolling fold<br>Forward flat fold<br>Backward<br>N/A | R/L                |
| <b>Ear side fold</b>            | Forward<br>Backward<br>N/A                                                               | R/L                |
| <b>Ear lobe shape</b>           | L-angular                                                                                | R/L                |

|                               |                                                                                                                                                                                               |     |
|-------------------------------|-----------------------------------------------------------------------------------------------------------------------------------------------------------------------------------------------|-----|
|                               | V-acute<br>U-rounded<br>N/A                                                                                                                                                                   |     |
| <b>Ear tears</b>              | None<br>At side fold<br>Before side fold<br>After side fold<br>On top fold<br>N/A                                                                                                             | R/L |
| <b>Ear holes</b>              | None<br>At side fold<br>Before side fold<br>After side fold<br>On top fold<br>N/A                                                                                                             | R/L |
| <b>Ear depigmentation</b>     | Present- Slight<br>Present- Prominent<br>None<br>N/A                                                                                                                                          | R/L |
| <b>Tail length</b>            | Stump (above abdomen)<br>Below genitals, above knee<br>Below knee, above ankle<br>At knee<br>At ankle<br>N/A                                                                                  |     |
| <b>Brush type</b>             | No hair<br>Short anterior<br>Short posterior<br>Short both<br>Short anterior normal posterior<br>Normal anterior short posterior<br>Normal anterior<br>Normal posterior<br>Normal both<br>N/A |     |
| <b>Back shape</b>             | Flat<br>Concave<br>Humped<br>N/A                                                                                                                                                              |     |
| <b>Depigmentation on body</b> | Present on trunk<br>Present on body<br>Both<br>None<br>N/A                                                                                                                                    |     |

**Table S2:  
Age classes and the trait state definitions**

| Age              | Trait State Definitions                                                                                                                                         |
|------------------|-----------------------------------------------------------------------------------------------------------------------------------------------------------------|
| <b>Age Class</b> | <i>Adults (A)</i> : around 15 years of age or older and, if female, had enlarged breasts or calves present                                                      |
|                  | <i>Subadults (B)</i> : typically, 50-100% the size of adults or the same height without enlarged breasts and were approximately seven to fourteen years of age. |
|                  | <i>Calves (C)</i> : identified if they could fit under the adults' belly or were within 50% of an adult's height and were approximately one to six years of age |
|                  | <i>Infants (D)</i> : typically, less than a year in age and fit under the belly of an adult                                                                     |
|                  | N/A: where age was not able to be determined due to quality of video or if genitalia was not visible                                                            |

**Table S3:**  
**Body condition characteristic and trait state definitions**

| <b>Body Condition</b> | <b>Trait State Definitions</b>                                                                                  |
|-----------------------|-----------------------------------------------------------------------------------------------------------------|
| <b>Body Condition</b> | <i>0</i> : the ribs, shoulder and pelvic girdles were prominent.                                                |
| <b>Body Condition</b> | <i>1</i> : ribs were not visible, shoulder and pelvic girdles were visible. Backbone was visible and pronounced |
| <b>Body Condition</b> | <i>2</i> : shoulders and pelvic girdles were not visible, neck rolls, and plump. Backbone was not prominent.    |

**Table S4:**  
**Tusk characteristics and trait state definitions**

| <b>Tusks/Tushes</b>      | <b>Trait State Definitions</b>                                                                                                                                              | <b>Examples</b> |
|--------------------------|-----------------------------------------------------------------------------------------------------------------------------------------------------------------------------|-----------------|
| <b>Presence of Tusks</b> | <i>Both</i> : when an elephant had both of their tusks or tushes                                                                                                            | Figures S1B-D   |
|                          | <i>Right only</i> : when an elephant only had a right tusk or tush                                                                                                          | Figure S1A      |
|                          | <i>Left only</i> : when an elephant only had a left tusk or tush                                                                                                            |                 |
|                          | <i>None</i> : when there were no tusks or tushes present for males or tushes present for females. If <i>none</i> was provided, the other tusk characteristics did not apply |                 |
| <b>Tusk Symmetry</b>     | <i>Even</i> : when tusks were growing at an even rate                                                                                                                       | Figure S1D      |
|                          | <i>Uneven</i> : when tusks were growing at an uneven rate or when one was broken (one tusk may be longer or shorter than the other)                                         | Figure S1A, S1C |
| <b>Tusk Arrangement</b>  | <i>Parallel</i> : tusks growing at the same angle, straight out, and pointing forward.                                                                                      |                 |
|                          | <i>Splayed</i> : tusks pointed outward (not parallel) from each other                                                                                                       | Figure S1D      |
|                          | <i>Convergent</i> : tusks growing out but inward, potentially resulting in tusks crossing over each other                                                                   | Figure S1C      |
| <b>Tusk Angle</b>        | <i>Straight ahead</i> : tusks growing out parallel to a horizontal plane                                                                                                    | Figure S1C, S1E |
|                          | <i>Intermediate</i> : tusks directed diagonally and not straight (parallel) or down (perpendicular)                                                                         |                 |
|                          | <i>Pointed down</i> : tusks growing downward, perpendicular to the horizontal plane                                                                                         | Figure S1B      |

**Table S5:  
Back shape characteristics and trait state definitions**

| Back Characteristics | Trait State Definitions                                                                                               | Examples        |
|----------------------|-----------------------------------------------------------------------------------------------------------------------|-----------------|
| Back Shape           | <i>Flat</i> : where the majority of the back was more or less a straight line                                         | Figure S2B, S2C |
|                      | <i>Concave</i> : where the back dipped in the center                                                                  |                 |
|                      | <i>Humped</i> : where the back was elevated, primarily in the middle, but humps can occur throughout the back as well | Figure S2A      |

**Table S6:**  
**Tail characteristics and trait state definitions**

| <b>Tail Characteristics</b> | <b>Trait State Definitions</b>                                                                                                                        | <b>Examples</b>      |
|-----------------------------|-------------------------------------------------------------------------------------------------------------------------------------------------------|----------------------|
| <b>Tail Length</b>          | <i>Stump (above abdomen):</i> a short and stubby tail that ended above the abdomen                                                                    | Figure S3F           |
|                             | <i>Below genitals: above knee:</i> a tail that extended between the genital area and above the knee                                                   | Figure S3D           |
|                             | <i>Below knee, above ankle:</i> a tail that extended anywhere between the knee and the ankle                                                          | Figure S3A, S3G      |
|                             | <i>At knee:</i> a tail that extended around the back of the knee                                                                                      | Figure S3C           |
|                             | <i>At ankle:</i> a tail that extended to the ankle (before the leg becomes wider, forming the foot pad)                                               | Figure S3B           |
| <b>Brush Type</b>           | <i>No hair:</i> there was no visible hair on the end of the tail                                                                                      | Figure S3C, S3F      |
|                             | <i>Short anterior:</i> hair stubble, not long enough to naturally curve, on the side closest to the body                                              |                      |
|                             | <i>Short posterior:</i> hair stubble, not long enough to naturally curve, on the side farthest from the body                                          |                      |
|                             | <i>Short both:</i> hair stubble on both sides of the tail                                                                                             |                      |
|                             | <i>Short anterior, normal posterior:</i> hair stubble on the side closest to the body and normal hair length on the side farthest from the body       |                      |
|                             | <i>Normal anterior, short posterior:</i> normal hair length on the side closest to the body and short/stubble hair on the side farthest from the body |                      |
|                             | <i>Normal anterior:</i> tail hair that is long enough to form its natural curve on the side closest to the body                                       | Figure S3D, S3E, S3H |
|                             | <i>Normal posterior:</i> tail hair that is long enough to form its natural curve on the side farthest from the body                                   |                      |
|                             | <i>Normal both:</i> tail hair that is long enough to form its natural curve on both sides of the tail                                                 | Figure S3A, S3B, S3G |



**Table S7:**  
**Body depigmentation and trait state definitions**

| <b>Depigmentation on Body</b> | <b>Trait State Definitions</b>                                                  |
|-------------------------------|---------------------------------------------------------------------------------|
| <b>Depigmentation on body</b> | <i>Present on Trunk:</i> depigmentation was viewed on the trunk of the elephant |
|                               | <i>Present on Body:</i> depigmentation was viewed on the body of the elephant   |
|                               | <i>Both:</i> depigmentation was viewed on both the body and trunk               |
|                               | <i>None:</i> depigmentation was not found                                       |

**Table S8:**  
**Interrater reliability results of elephant characteristic categorization**

Reliability was calculated for a subset of 30 videos of different individuals (19 daytime, 11 night); two data points from each video were included in the calculation for characteristics that were recorded on both the left and right side of an individual’s body. The interpretation of level of agreement is based on benchmarks suggested by Landis & Koch (1977).

| <b>Characteristic</b> | <b>Cohen’s kappa</b> | <b>Level of agreement</b> |
|-----------------------|----------------------|---------------------------|
| Presence of tusks     | 1                    | Excellent                 |
| Sex                   | 0.81                 | Excellent                 |
| Tusk symmetry         | 0.74                 | Good                      |
| Tail brush            | 0.67                 | Good                      |
| Tusk angle            | 0.65                 | Good                      |
| Tusk arrangement      | 0.65                 | Good                      |
| Side fold             | 0.59                 | Moderate                  |
| Ear hole              | 0.58                 | Moderate                  |
| Ear lobe              | 0.54                 | Moderate                  |
| Tail length           | 0.53                 | Moderate                  |
| Top fold              | 0.47                 | Moderate                  |
| Ear tear              | 0.38                 | Fair                      |
| Ear depigmentation    | 0.36                 | Fair                      |
| Body condition        | 0.23                 | Fair                      |
| Back shape            | 0.15                 | Poor                      |
| Body depigmentation   | 0.13                 | Poor                      |

**Table S9:**

**Elephant count and calculation results for  $p_{\max}^2$  for all adult elephants (n=72), including most to least common characteristic and trait state option, excluding back shape and depigmentation on body**

| <b>Ranked Characteristics</b>   | <b>Majority Trait State</b> | <b>Number of elephants with trait</b> | <b>Proportion</b> | <b>Number of elephants with combination</b> | $p_{\max}$ | $p_{\max}^2$ |
|---------------------------------|-----------------------------|---------------------------------------|-------------------|---------------------------------------------|------------|--------------|
| <b>Presence of tusks/tushes</b> | None                        | 63                                    | 0.875             | 63                                          |            |              |
| <b>L ear hole</b>               | None                        | 61                                    | 0.847             | 54                                          | 0.857      | 0.735        |
| <b>Tail length</b>              | Below knee, above ankle     | 58                                    | 0.8556            | 43                                          | 0.697      | 0.485        |
| <b>L ear side fold</b>          | Backward                    | 56                                    | 0.778             | 35                                          | 0.698      | 0.487        |
| <b>R ear hole</b>               | None                        | 56                                    | 0.778             | 28                                          | 0.557      | 0.311        |
| <b>R ear side fold</b>          | Backward                    | 55                                    | 0.764             | 27                                          | 0.673      | 0.453        |
| <b>R ear depigmentation</b>     | Present-Prominent           | 53                                    | 0.736             | 21                                          | 0.434      | 0.188        |
| <b>Sex</b>                      | Male                        | 52                                    | 0.722             | 14                                          | 0.449      | 0.201        |
| <b>Body condition</b>           | 1                           | 49                                    | 0.681             | 11                                          | 0.341      | 0.116        |
| <b>L ear depigmentation</b>     | Present-Prominent           | 48                                    | 0.66              | 11                                          | 0.449      | 0.201        |
| <b>R ear lobe shape</b>         | V-acute                     | 47                                    | 0.653             | 6                                           | 0.186      | 0.035        |
| <b>L ear lobe shape</b>         | V-acute                     | 46                                    | 0.639             | 6                                           | 0.449      | 0.201        |
| <b>Brush type</b>               | Normal both                 | 42                                    | 0.583             | 5                                           | 0.155      | 0.24         |
| <b>R ear tear</b>               | At side fold                | 37                                    | 0.514             | 2                                           | 0.179      | 0.032        |
| <b>L ear top fold</b>           | Forward rolling fold        | 31                                    | 0.431             | 2                                           | 0.155      | 0.24         |
| <b>R ear top fold</b>           | Forward rolling fold        | 31                                    | 0.431             | 2                                           | 0.179      | 0.032        |
| <b>L ear tear</b>               | At side fold                | 29                                    | 0.403             | 1                                           | 0.077      | 0.006        |
| <b>Tusk symmetry</b>            | Uneven                      | 5                                     | 0.069             | 0                                           | 0          | 0            |
| <b>R tusk angle</b>             | Straight ahead              | 5                                     | 0.069             | -                                           | -          | -            |
| <b>L tusk angle</b>             | Straight ahead              | 4                                     | 0.054             | -                                           | -          | -            |
| <b>Tusk arrangement</b>         | N/A                         | 3                                     | 0.042             | -                                           | -          | -            |

**Table S10:**

**Elephant count and calculation results for  $p_{\max}^2$  for adult male elephants (n=52), including most to least common characteristic and trait state option**

| <b>Ranked Characteristics</b> | <b>Majority Trait State</b> | <b>Number of elephants with trait</b> | <b>Proportion</b> | <b>Number of elephants with combination</b> | $p_{\max}$ | $p_{\max}^2$ |
|-------------------------------|-----------------------------|---------------------------------------|-------------------|---------------------------------------------|------------|--------------|
| <b>Back shape</b>             | Humped                      | 46                                    | 0.885             | 46                                          |            |              |
| <b>Presence of tusks</b>      | None                        | 43                                    | 0.827             | 37                                          | 0.804      | 0.647        |
| <b>L ear hole</b>             | None                        | 42                                    | 0.808             | 30                                          | 0.717      | 0.514        |
| <b>Tail length</b>            | Below knee, above ankle     | 42                                    | 0.808             | 23                                          | 0.617      | 0.380        |
| <b>Depigmentation on body</b> | Both                        | 41                                    | 0.788             | 18                                          | 0.561      | 0.315        |
| <b>L ear side fold</b>        | Backward                    | 40                                    | 0.769             | 16                                          | 0.548      | 0.300        |
| <b>R ear depigmentation</b>   | Present-Prominent           | 38                                    | 0.731             | 12                                          | 0.421      | 0.177        |
| <b>R ear side fold</b>        | Backward                    | 37                                    | 0.712             | 12                                          | 0.548      | 0.300        |
| <b>R ear hole</b>             | None                        | 37                                    | 0.712             | 10                                          | 0.351      | 0.123        |
| <b>L ear depigmentation</b>   | Present-Prominent           | 33                                    | 0.635             | 10                                          | 0.548      | 0.300        |
| <b>Body condition</b>         | 1                           | 31                                    | 0.596             | 8                                           | 0.281      | 0.079        |
| <b>R ear lobe shape</b>       | V-acute                     | 31                                    | 0.596             | 5                                           | 0.343      | 0.117        |
| <b>L ear lobe shape</b>       | V-acute                     | 29                                    | 0.558             | 5                                           | 0.281      | 0.079        |
| <b>R ear tear</b>             | At side fold                | 29                                    | 0.558             | 3                                           | 0.206      | 0.042        |
| <b>Brush type</b>             | Normal both                 | 28                                    | 0.538             | 2                                           | 0.187      | 0.035        |
| <b>R ear top fold</b>         | Forward rolling fold        | 24                                    | 0.462             | 2                                           | 0.206      | 0.042        |
| <b>L ear top fold</b>         | Forward rolling fold        | 23                                    | 0.442             | 2                                           | 0.187      | 0.035        |
| <b>L ear tear</b>             | At side fold                | 23                                    | 0.442             | 1                                           | 0.103      | 0.011        |
| <b>Tusk symmetry</b>          | Uneven                      | 5                                     | 0.096             | 0                                           | 0          | 0            |
| <b>R tusk angle</b>           | Straight ahead              | 5                                     | 0.096             | -                                           | -          | -            |
| <b>L tusk angle</b>           | Straight ahead              | 4                                     | 0.077             | -                                           | -          | -            |
| <b>Tusk arrangement</b>       | N/A                         | 3                                     | 0.058             | -                                           | -          | -            |

**Table S11:**

**Elephant count and calculation results for  $p_{\max}^2$  for adult male elephants (n=52), including most to least common characteristic and trait state option, excluding back shape and depigmentation on body**

| <b>Ranked Characteristics</b> | <b>Majority Trait State</b> | <b>Number of elephants with trait</b> | <b>Proportion</b> | <b>Number of elephants with combination</b> | $p_{\max}$ | $p_{\max}^2$ |
|-------------------------------|-----------------------------|---------------------------------------|-------------------|---------------------------------------------|------------|--------------|
| <b>Presence of tusks</b>      | None                        | 43                                    | 0.827             | 43                                          |            |              |
| <b>L ear hold</b>             | None                        | 42                                    | 0.808             | 35                                          | 0.814      | 0.663        |
| <b>Tail length</b>            | Below knee, above ankle     | 42                                    | 0.808             | 28                                          | 0.662      | 0.438        |
| <b>L ear side fold</b>        | Backward                    | 40                                    | 0.769             | 24                                          | 0.698      | 0.487        |
| <b>R ear depigmentation</b>   | Present-Prominent           | 38                                    | 0.731             | 17                                          | 0.469      | 0.220        |
| <b>R ear side fold</b>        | Backward                    | 37                                    | 0.712             | 16                                          | 0.657      | 0.431        |
| <b>R ear hole</b>             | None                        | 37                                    | 0.712             | 14                                          | 0.410      | 0.168        |
| <b>L ear depigmentation</b>   | Present-Prominent           | 33                                    | 0.635             | 14                                          | 0.657      | 0.431        |
| <b>Body condition</b>         | 1                           | 31                                    | 0.596             | 11                                          | 0.322      | 0.104        |
| <b>R ear lobe shape</b>       | V-acute                     | 31                                    | 0.596             | 6                                           | 0.358      | 0.128        |
| <b>L ear lobe shape</b>       | V-acute                     | 29                                    | 0.558             | 6                                           | 0.322      | 0.104        |
| <b>R ear tear</b>             | At side fold                | 29                                    | 0.558             | 3                                           | 0.179      | 0.032        |
| <b>Brush type</b>             | Normal both                 | 28                                    | 0.538             | 2                                           | 0.215      | 0.046        |
| <b>R ear top fold</b>         | Forward rolling fold        | 24                                    | 0.462             | 2                                           | 0.179      | 0.032        |
| <b>L ear top fold</b>         | Forward rolling fold        | 23                                    | 0.442             | 2                                           | 0.215      | 0.046        |
| <b>L ear tear</b>             | At side fold                | 23                                    | 0.442             | 1                                           | 0.090      | 0.008        |
| <b>Tusk symmetry</b>          | Uneven                      | 5                                     | 0.096             | 0                                           | 0          | 0            |
| <b>R tusk angle</b>           | Straight ahead              | 5                                     | 0.096             | -                                           | -          | -            |
| <b>L tusk angle</b>           | Straight ahead              | 4                                     | 0.077             | -                                           | -          | -            |
| <b>Tusk arrangement</b>       | N/A                         | 3                                     | 0.058             | -                                           | -          | -            |

**Table S12:**

**Elephant count and calculation results for  $p_{\max}^2$  for adult female elephants (n=20), including most to least most common characteristic and trait state option**

| <b>Ranked Characteristics</b>   | <b>Majority Trait State</b> | <b>Number of elephants with trait</b> | <b>Proportion</b> | <b>Number of elephants with combination</b> | $p_{\max}$ | $p_{\max}^2$ |
|---------------------------------|-----------------------------|---------------------------------------|-------------------|---------------------------------------------|------------|--------------|
| <b>Presence of tusks/tushes</b> | None                        | 20                                    | 1.00              | 20                                          |            |              |
| <b>L ear hole</b>               | None                        | 19                                    | 0.95              | 19                                          | 0.950      | 0.903        |
| <b>R ear hole</b>               | None                        | 19                                    | 0.95              | 18                                          | 0.947      | 0.898        |
| <b>Body condition</b>           | 1                           | 18                                    | 0.90              | 16                                          | 0.844      | 0.713        |
| <b>R ear side fold</b>          | Backward                    | 18                                    | 0.90              | 15                                          | 0.888      | 0.789        |
| <b>Back shape</b>               | Humped                      | 17                                    | 0.85              | 13                                          | 0.732      | 0.536        |
| <b>L ear lobe shape</b>         | V-acute                     | 17                                    | 0.85              | 10                                          | 0.683      | 0.467        |
| <b>L ear side fold</b>          | Backward                    | 16                                    | 0.80              | 9                                           | 0.659      | 0.434        |
| <b>R ear lobe shape</b>         | V-acute                     | 16                                    | 0.80              | 8                                           | 0.683      | 0.467        |
| <b>Tail length</b>              | Below knee, above ankle     | 16                                    | 0.80              | 8                                           | 0.585      | 0.343        |
| <b>L ear depigmentation</b>     | Present-Prominent           | 15                                    | 0.75              | 5                                           | 0.427      | 0.182        |
| <b>R ear depigmentation</b>     | Present-Prominent           | 15                                    | 0.75              | 5                                           | 0.585      | 0.343        |
| <b>Brush type</b>               | Normal both                 | 14                                    | 0.70              | 4                                           | 0.342      | 0.117        |
| <b>L ear tear</b>               | None                        | 11                                    | 0.55              | 2                                           | 0.439      | 0.193        |
| <b>Depigmentation on body</b>   | Both                        | 11                                    | 0.55              | 2                                           | 0.228      | 0.052        |
| <b>R ear tear</b>               | None                        | 10                                    | 0.50              | 1                                           | 0.220      | 0.048        |
| <b>L ear top fold</b>           | Forward rolling fold        | 8                                     | 0.40              | 0                                           | 0          | 0            |
| <b>R ear top fold</b>           | Forward slightly            | 8                                     | 0.40              | -                                           | -          | -            |

**Table S13:**

**Elephant count and calculation results for  $p_{\max}^2$  for adult female elephants (n=20), including most to least most common characteristic and trait state option, excluding back shape and depigmentation on body**

| <b>Ranked Characteristics</b>   | <b>Majority Trait State</b> | <b>Number of elephants with trait</b> | <b>Proportion</b> | <b>Number of elephants with combination</b> | $p_{\max}$ | $p_{\max}^2$ |
|---------------------------------|-----------------------------|---------------------------------------|-------------------|---------------------------------------------|------------|--------------|
| <b>Presence of tusks/tushes</b> | None                        | 20                                    | 1.00              | 20                                          |            |              |
| <b>L ear hole</b>               | None                        | 19                                    | 0.95              | 19                                          | 0.950      | 0.903        |
| <b>R ear hole</b>               | None                        | 19                                    | 0.95              | 18                                          | 0.947      | 0.898        |
| <b>Body condition</b>           | 1                           | 18                                    | 0.90              | 16                                          | 0.844      | 0.713        |
| <b>R ear side fold</b>          | Backward                    | 18                                    | 0.90              | 15                                          | 0.888      | 0.789        |
| <b>L ear lobe shape</b>         | V-acute                     | 17                                    | 0.85              | 12                                          | 0.676      | 0.456        |
| <b>L ear side fold</b>          | Backward                    | 16                                    | 0.80              | 10                                          | 0.740      | 0.548        |
| <b>R ear lobe shape</b>         | V-acute                     | 16                                    | 0.80              | 10                                          | 0.676      | 0.456        |
| <b>Tail length</b>              | Below knee, above ankle     | 16                                    | 0.80              | 9                                           | 0.666      | 0.444        |
| <b>L ear depigmentation</b>     | Present-Prominent           | 15                                    | 0.75              | 6                                           | 0.450      | 0.203        |
| <b>R ear depigmentation</b>     | Present-Prominent           | 15                                    | 0.75              | 6                                           | 0.666      | 0.444        |
| <b>Brush type</b>               | Normal both                 | 14                                    | 0.70              | 5                                           | 0.375      | 0.141        |
| <b>L ear tear</b>               | None                        | 11                                    | 0.55              | 4                                           | 0.533      | 0.284        |
| <b>R ear tear</b>               | None                        | 10                                    | 0.50              | 3                                           | 0.281      | 0.079        |
| <b>L ear top fold</b>           | Forward rolling fold        | 8                                     | 0.40              | 0                                           | 0          | 0            |
| <b>R ear top fold</b>           | Forward slightly            | 8                                     | 0.40              | -                                           | -          | -            |

## References Cited in Supplemental Tables

- de Silva S, Webber CE, Weerathunga US, Pushpakumara TV, Weerakoon DK, Wittemyer G. 2013. Demographic variables for wild Asian elephants using longitudinal observations. *PLOS ONE* **8(12)**:e82788. DOI: 10.1371/journal.pone.0082788.
- Goswami VR, Madhusudan MD, Karanth KU. 2007. Application of photographic capture-recapture modelling to estimate demographic parameters for male Asian elephants. *Animal Conservation* **10(3)**:391–399. DOI: 10.1111/j.1469-1795.2007.00124.x.
- Landis JR, Koch GG. 1977. The measurement of observer agreement for categorical data. *Biometrics*, **33(1)**:159-174. DOI: 10.2307/2529310.
- Vidya TNC, Prasad D, Ghosh A. 2014. Individual identification in Asian elephants. *Gajah* **40**:3–17.
